# Supplementary material for: Protective Effect of Bifidobacterium animalis subs. lactis MG741 as Probiotics against UVB-Exposed Fibroblasts and Hairless Mice
Source: MDPI journal article supplement (doi:10.3390/microorganisms10122343), 2022-11-26
Supplement: s1 [file s1]

**Table S1.** Primer sequence used in this study.

| Origin | Gene <sup>1</sup> | Sequence (3'→5')            |                          |
|--------|-------------------|-----------------------------|--------------------------|
|        |                   | Forward                     | Reverse                  |
| Human  | <i>MMP-1</i>      | GCATATCGATGCTGCTCTTTC       | GATAACCTGGATCCATAGATCGTT |
|        | <i>MMP-3</i>      | CAAAACATATTTCTTTGTAGAGGACAA | TTCAGCTATTTGCTTGGGAAA    |
|        | <i>GAPDH</i>      | ACCCACTCCTCCACCTTTG         | ACCCACTCCTCCACCTTTG      |
| Mouse  | <i>IL-6</i>       | GAGACTTCCATCCAGTTGCCT       | TGGGAGTGGTATCCTCTGTGA    |
|        | <i>TNF-</i>       | TGTCTACTCCTCAGAGCCCC        | TGAGTCCTTGATGGTGGTGC     |
|        | <i>GAPDH</i>      | TCTCCCTCACAATTCCATCC        | GGGTGCAGCGAACTTTATTG     |

<sup>1</sup>*MMP*, matrix metalloproteinase; *IL*, interleukin; *TNF*, tumor necrosis factor; *GAPDH*, glyceraldehyde 3-phosphate dehydrogenase.

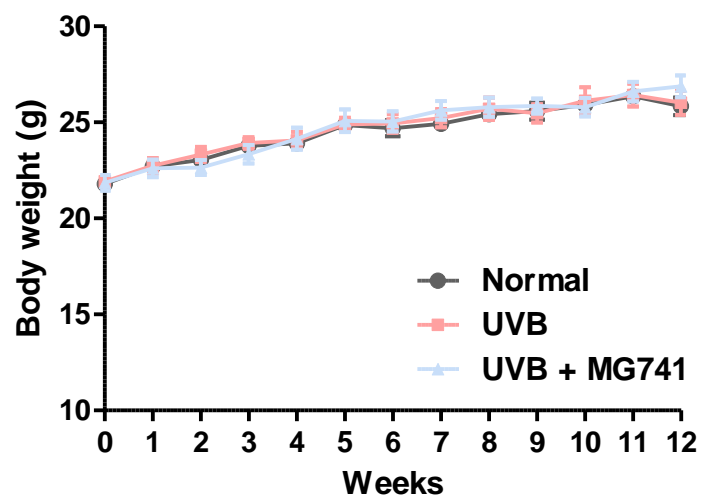

**Figure S1.** Body weight change against administration of *Bi. lactis* MG741 in UVB-exposed HR-1 mice. Data indicated mean  $\pm$  SEM ( $n = 6$ ).

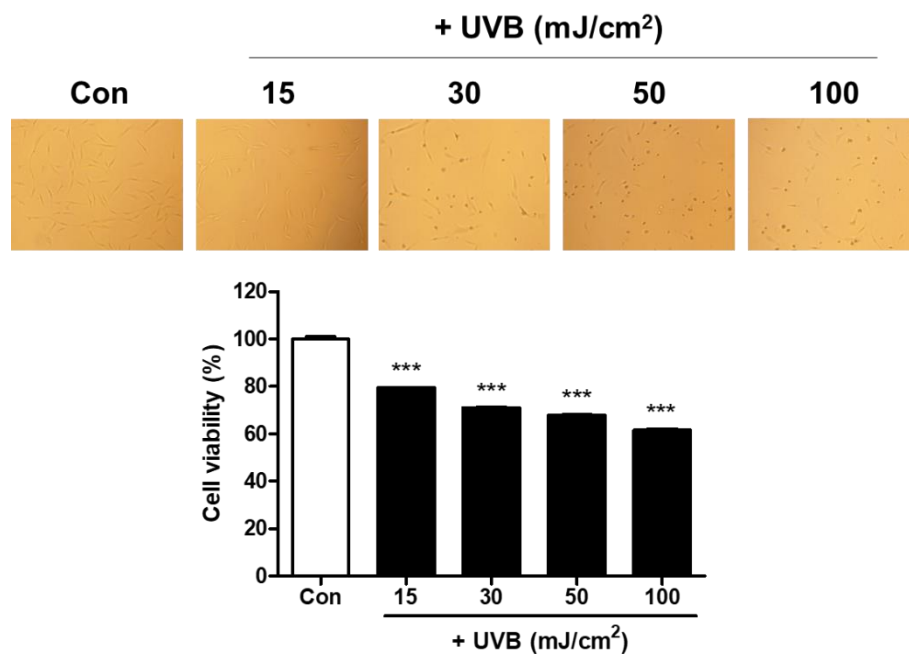

**Figure S2.** Cell morphology and viability against UVB treatment on Hs68 cells. UVB (15, 30, 50 and 100 mJ/cm<sup>2</sup>) exposed Hs68 cells, for 24 h. The data indicated mean  $\pm$  SEM in triplicate. Statistical differences are showed with \*\*\* $p < 0.001$  compared to control (non-expose UVB).
